# Supplementary material
Source: PubMed Central journal article supplement (PMC4610873)
Supplement: NIHMS721356-supplement-1.pdf [file NIHMS721356-supplement-1.pdf]

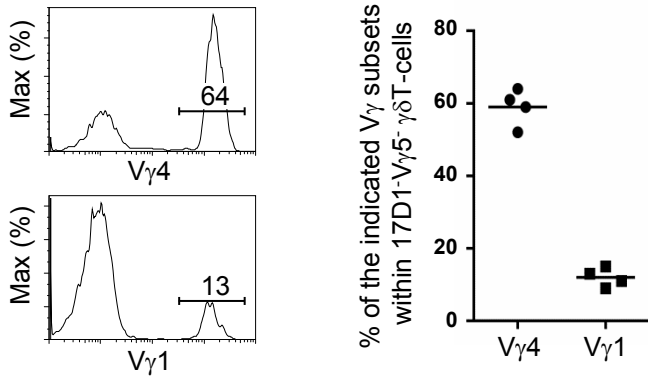

**Supplementary Figure 1. V $\gamma$  subsets in E16 17D1-V $\gamma$ 5-  $\gamma$  $\delta$ T-cells.**

Histogram analysis and gram plot showing the percentage of the indicated  $\gamma$  $\delta$ T-cell subsets within the 17D1-V $\gamma$ 5- subpopulation of E16  $\gamma$  $\delta$ T-cells. The numbers within the histogram represent the proportion of cells within the gate. The gram plot represent the percentage of cells corresponding to the indicated subsets. Each dot in the gram plots represents data from a fetus and horizontal lines represent the mean value.

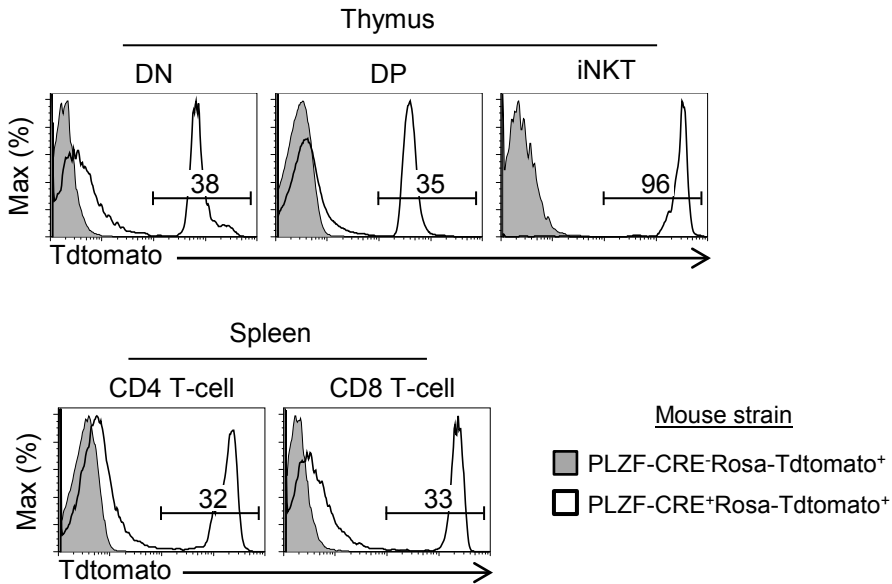

**Supplementary Figure 2. PLZF fate mapping in  $\alpha\beta$ T-cells.**

Histogram plots showing the percentage of Tdtomato-positive events in the thymus and spleen of the indicated compound mice. CD4-CD8- (DN); CD4+CD8+ (DP); aGC-CD1dtetramer<sup>+</sup>H57<sup>int</sup> (iNKT). The numbers within the histogram represent the proportion of cells within the gate. Data is representative of three independent experiments.

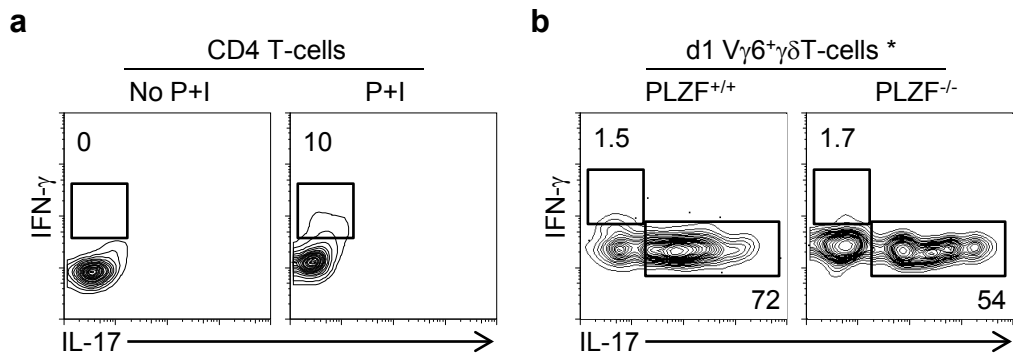

**Supplementary Figure 3. IFN- $\gamma$  intracellular staining in fetal V $\gamma$ 6<sup>+</sup>  $\gamma$  $\delta$ T-cells.**

**a).** Intracellular FACs analysis to analyze IFN- $\gamma$  levels in gated CD4<sup>+</sup> T-cells (TCR $\beta$ <sup>+</sup>CD4<sup>+</sup>) from the spleen of adult mice that have been stimulated with PMA + Ionomycin (P+I) to stimulate cytokine secretion. **b)** Ex vivo analysis of cytokine secretion in gated day 1 (d1) V $\gamma$ 6<sup>+</sup>  $\gamma$  $\delta$ T-cells. This experiment is representative of 2 independent experiments. \* V $\gamma$ 6<sup>+</sup> cells are identified as GL3<sup>+</sup>2C11<sup>+</sup>V $\gamma$ 5-17D1<sup>+</sup> cells.
